# Supplementary material
Source: MDPI journal article supplement (https://www.mdpi.com/2077-0472/13/2/232)
Supplement: s1 [file s1]

**Table S1.** TL<sub>50</sub> and TL<sub>99</sub> values (days) and associated parameters for adults of *Callosobruchus maculatus* fumigated with EO of peel's *Citrus aurantium*.

| Gender               | Concentration<br>( $\mu\text{L/L}$ air) | Probit parameters          |                           |          |    |         |
|----------------------|-----------------------------------------|----------------------------|---------------------------|----------|----|---------|
|                      |                                         | LT* <sub>50</sub> (95% CL) | LT <sub>99</sub> (95% CL) | $\chi^2$ | df | p       |
| Females<br>(N=300)   | 0                                       | 8.36 (8.10-8.62)           | 12.70 (12.12-13.44)       | 12.91    | 11 | 0.299   |
|                      | 25                                      | 4.26 (3.83 - 4.69)         | 8.32 (7.45 - 9.66)        | 13.27    | 7  | 0.066   |
|                      | 50                                      | 3.05 (2.30 - 3.75)         | 7.53 (6.23 - 10.22)       | 23.74    | 6  | 0.001** |
|                      | 100                                     | 1.63 (1.10 - 2.10)         | 4.10 (3.32 - 5.83)        | 10.27    | 4  | 0.036** |
|                      | 200                                     | 0.77 (0.62 - 0.91)         | 1.74 (1.50 - 2.16)        | 0.003    | 1  | 0.96    |
| Males<br>(N=300)     | 0                                       | 7.77 (7.50 - 8.05)         | 12.26 (11.64 - 13.06)     | 13.68    | 10 | 0.188   |
|                      | 25                                      | 2.55 (2.04 - 3.02)         | 6.57 (5.66 - 8.10)        | 12.73    | 6  | 0.047** |
|                      | 50                                      | 1.55 (1.37 - 1.73)         | 3.54 (3.18 - 4.04)        | 4.65     | 3  | 0.2     |
|                      | 100                                     | 0.74 (0.60 - 0.87)         | 1.67 (1.44 - 2.06)        | 0.00     | 1  | 0.952   |
|                      | 200                                     | 0.51 (0.21 - 1.06)         | 0.85 (0.45 - 2.19)        | 0.05     | 1  | 0.831   |
| Phosphine (♀♀ or ♂♂) |                                         | 0.51 (-0.21 - 1.06)        | 0.85 (0.45 - 2.19)        | 0.05     | 1  | 0.831   |

\*: LT= Lethal time; \*\*: When  $p > 0.05$ , the results fit well to the "Probit" analysis model, while when  $p \leq 0.05$ , a heterogeneity factor was used in the calculation of confidence intervals.

**Table S2.** LC<sub>50</sub> and LC<sub>99</sub> with their 95% confidence intervals (CI) ( $\mu\text{L} / \text{L}$  air) and  $\chi^2$  of the EO of *Citrus aurantium* peel used against adults of *Callosobruchus maculatus*.

| Gender               | Days | Slope $\pm$ SE   | Intercept $\pm$ SE | LC* <sub>50</sub> (95% CI) | LC <sub>99</sub> (95% CI) | $\chi^2$ | df | p ** |
|----------------------|------|------------------|--------------------|----------------------------|---------------------------|----------|----|------|
| Females<br>(N = 300) | 1    | 0.01 $\pm$ 0.001 | -2.02 $\pm$ 0.18   | 147.59 (105.57 - 236.76)   | 317.32 (231.14 - 650.63)  | 10.32    | 3  | 0.02 |
|                      | 2    | 0.03 $\pm$ 0.003 | -1.77 $\pm$ 0.19   | 66.99 (59.48 - 75.83)      | 155.17 (135.81 - 184.63)  | 4.06     | 3  | 0.26 |
|                      | 3    | 0.03 $\pm$ 0.003 | -1.51 $\pm$ 0.18   | 48.20 (41.94 - 55.08)      | 122.47 (107.15 - 145.53)  | 4.90     | 3  | 0.18 |
|                      | 4    | 0.03 $\pm$ 0.004 | -1.13 $\pm$ 0.16   | 35.81 (29.64 - 42.25)      | 109.66 (94.20 - 133.94)   | 3.18     | 3  | 0.37 |
|                      | 5    | 0.04 $\pm$ 0.01  | -0.91 $\pm$ 0.16   | 24.62 (18.88 - 30.11)      | 87.29 (73.94 - 109.25)    | 2.78     | 3  | 0.43 |
|                      | 6    | 0.06 $\pm$ 0.01  | -0.69 $\pm$ 0.17   | 12.39 (3.82 - 23.46)       | 54.36 (37.89 - 114.94)    | 6.73     | 3  | 0.08 |
| Males<br>(N = 300)   | 1    | 0.01 $\pm$ 0.01  | -1.31 $\pm$ 0.13   | 109.26 (62.42 - 206.10)    | 303.62 (206.52 - 793.05)  | 12.16    | 3  | 0.01 |
|                      | 2    | 0.03 $\pm$ 0.003 | -1.32 $\pm$ 0.17   | 45.02 (24.62 - 70.30)      | 124.39 (89.83 - 253.77)   | 8.66     | 3  | 0.03 |
|                      | 3    | 0.05 $\pm$ 0.01  | -1.18 $\pm$ 0.19   | 24.65 (9.60 - 38.23)       | 73.39 (53.25 - 149.52)    | 7.17     | 3  | 0.07 |
|                      | 4    | 0.07 $\pm$ 0.01  | -1.13 $\pm$ 0.2    | 16.60 (12.71 - 20.32)      | 50.94 (43.86 - 61.87)     | 4.22     | 3  | 0.24 |
|                      | 5    | 0.09 $\pm$ 0.01  | -0.91 $\pm$ 0.19   | 10.32 (6.99 - 13.60)       | 36.85 (30.81 - 46.53)     | 0.02     | 3  | 1.00 |

\*: LC= Lethal concentration; \*\*: When  $p > 0.05$ , the results fit well with the "Probit" analysis model; whereas when  $P \leq 0.05$ , a heterogeneity factor was used in the calculation of confidence intervals .

**Table S3.** Parameters of non-linear regression analyses of *Callosobruchus maculatus* adults F1 emerged daily from chickpea grains fumigated with *Citrus aurantium* peel EO (shown in Figure 6) according to the model  $y = a \cdot \exp(-0.5 \cdot ((x - x_0)/b)^2)$  [a (Number) = Peak of the daily emergence of adults, b (Days) = Standard deviation of  $x_0$ ,  $x_0$  (Days) = Location of peak emergence since the start of fumigation].

| Gender  | Concentration<br>( $\mu\text{L/L}$ air) | Estimated parameters ( $\pm$ SE) |                 |                  | R <sup>2</sup> | df <sub>Residual</sub> | F      | p       |
|---------|-----------------------------------------|----------------------------------|-----------------|------------------|----------------|------------------------|--------|---------|
|         |                                         | a*                               | b               | $x_0$            |                |                        |        |         |
| Females | 0                                       | 35.56 $\pm$ 2.85                 | 2.50 $\pm$ 0.24 | 27.72 $\pm$ 0.23 | 0.89           | 64                     | 624.39 | <0.0001 |
|         | 25                                      | 11.81 $\pm$ 1.47                 | 1.86 $\pm$ 0.27 | 27.45 $\pm$ 0.27 | 0.82           | 52                     | 210.74 | <0.0001 |
|         | 50                                      | 2.24 $\pm$ 0.34                  | 3.30 $\pm$ 0.71 | 28.43 $\pm$ 0.59 | 0.55           | 58                     | 91.48  | <0.0001 |
|         | 100                                     | 0.65 $\pm$ 0.12                  | 3.16 $\pm$ 1.13 | 27.75 $\pm$ 0.97 | 0.52           | 40                     | 16.2   | <0.0001 |
| Males   | 0                                       | 34.50 $\pm$ 2.79                 | 2.47 $\pm$ 0.24 | 27.70 $\pm$ 0.23 | 0.89           | 64                     | 609.81 | <0.0001 |
|         | 25                                      | 11.42 $\pm$ 1.31                 | 1.88 $\pm$ 0.25 | 27.28 $\pm$ 0.25 | 0.85           | 52                     | 226.52 | <0.0001 |
|         | 50                                      | 1.98 $\pm$ 0.33                  | 3.76 $\pm$ 1.33 | 29.30 $\pm$ 1.12 | 0.52           | 52                     | 62.67  | <0.0001 |

---

|     |             |             |              |      |    |      |         |
|-----|-------------|-------------|--------------|------|----|------|---------|
| 100 | 1.13 ± 0.10 | 2.84 ± 0.67 | 29.35 ± 0.76 | 0.90 | 40 | 30.4 | <0.0001 |
|-----|-------------|-------------|--------------|------|----|------|---------|

---

\*: For each sex, all the peaks compared 2 to 2 are statistically different at  $p < 0.05$ .
